# Supplementary material
Source: publisher figshare collection journal article supplement (https://gsajournals.figshare.com/ndownloader/files/26403796)
Supplement: Supplementary file 1 [file 26403796]

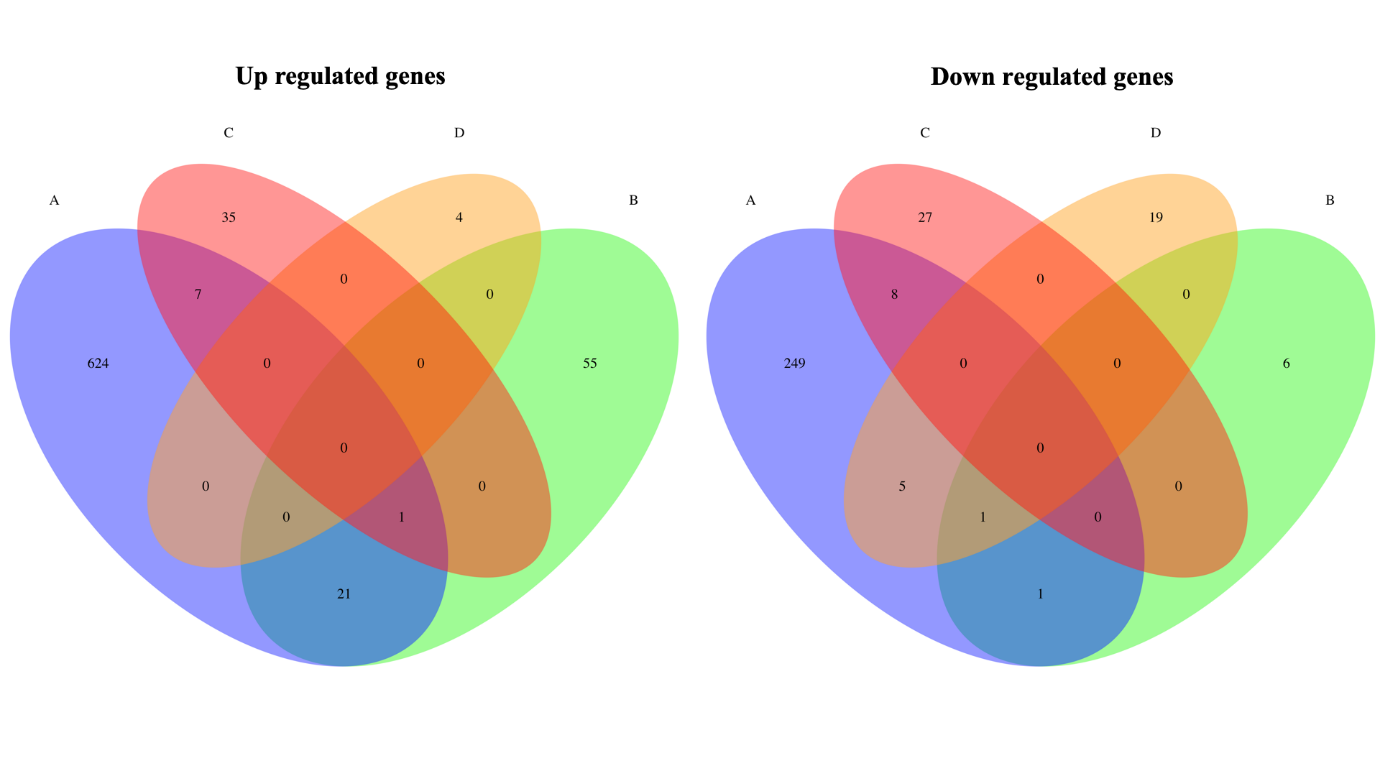


**Supplementary Figure S1** Venn diagrams indicating overlap between our data set and that of previously published studies. (A) Current study, (B) Bandara and co-workers (2020), (C) Proteins expressed at 24h in Trejo-Hernandez and co-workers (2014), (D) 6 hour secretome in Purchke and co-workers (2012)
